# Supplementary material for: Association between insomnia and cognitive performance, gray matter volume, and white matter microstructure in cognitively unimpaired adults
Source: Springer Nature journal article supplement (doi:10.1186/s13195-019-0547-3), 2020-01-07
Supplement: MOESM1 [file 23189420]

## Additional file 1

**Figure S1.** Interaction between APOE status and insomnia in cognitive performance

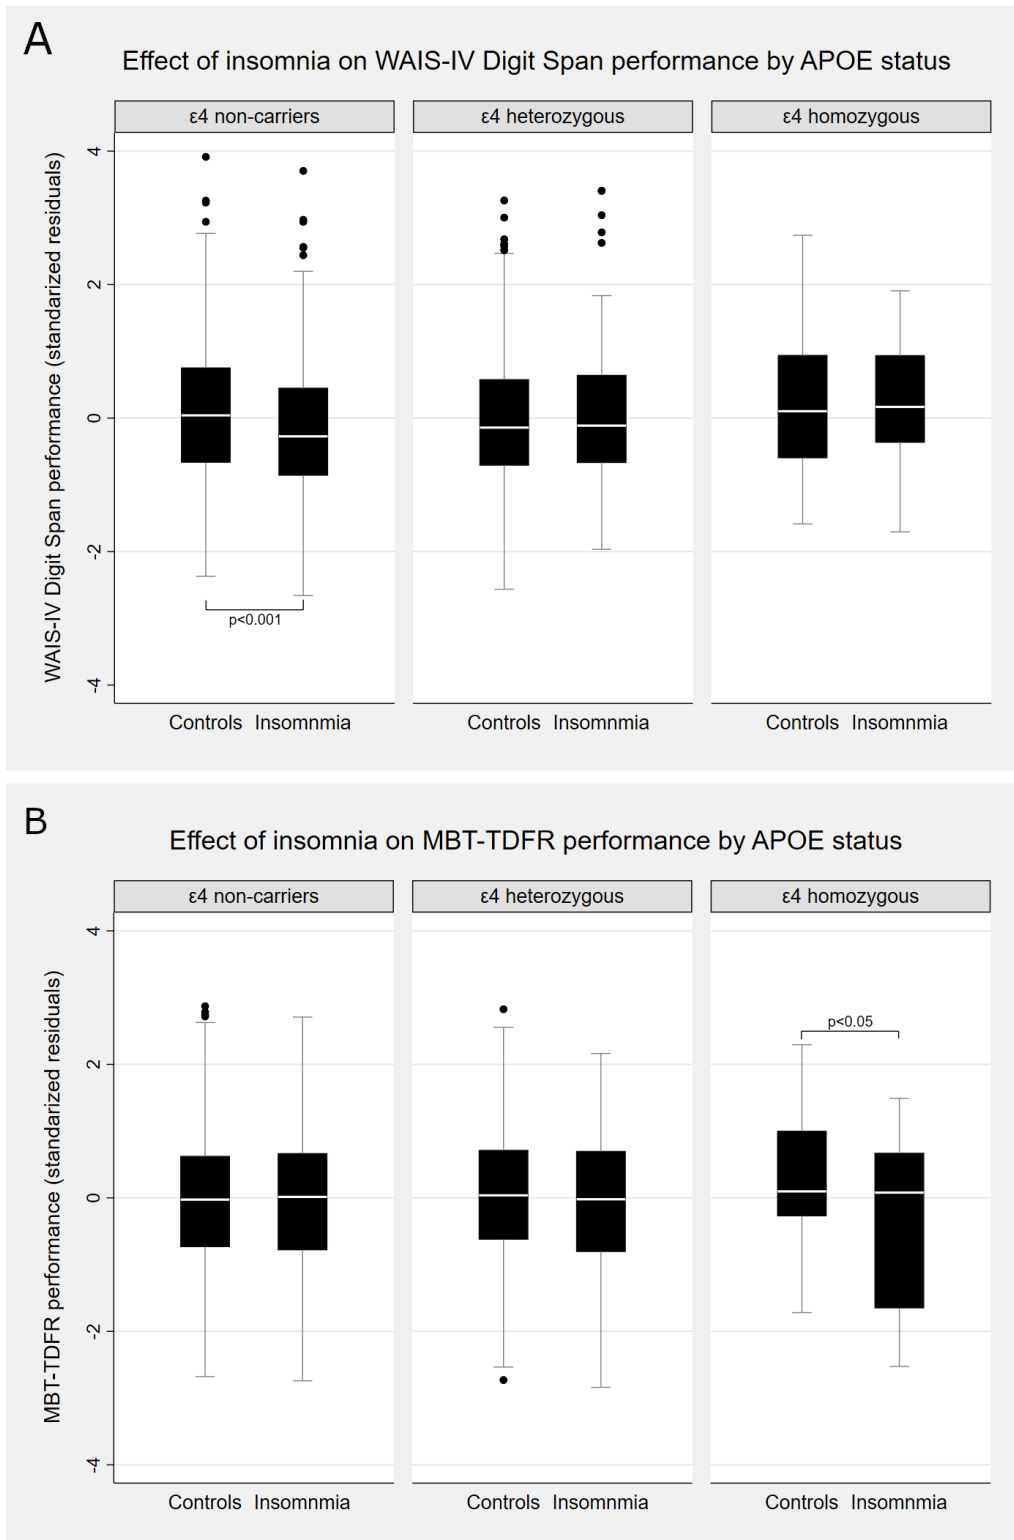

Graphs showing the differential effect of insomnia in cognitive performance depending on the APOE status. Statistically significant negative effects of insomnia are observed in Digit Span performance among APOE- $\epsilon 4$  non-carriers only (A) and in MBT-TDFR performance among APOE- $\epsilon 4$  homozygous only.

**Figure S2.** Effect of insomnia on gray matter volume (additionally adjusted by hypertension, dyslipidemia and physical activity)

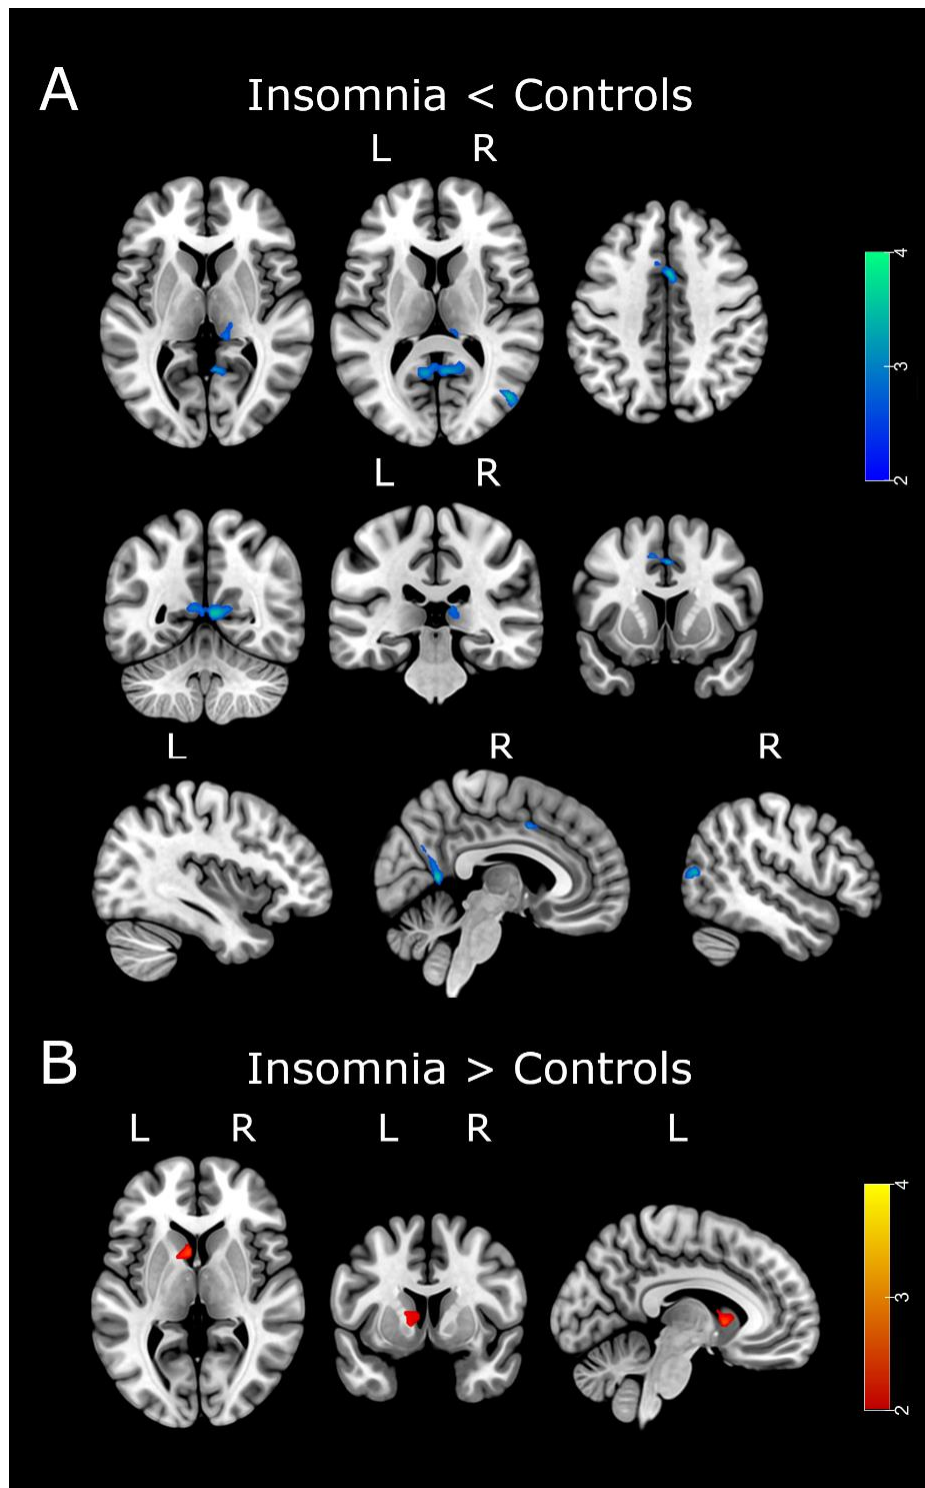

A: Blue-green colored regions show areas with significantly lower volume in participants with insomnia compared with controls (puncorrected<0.005; k=100). B: Red-yellow colored areas show areas with significantly higher brain volume in participants with insomnia compared with controls. L: Left hemisphere. R: right hemisphere.

**Figure S3.** Effect of insomnia on white matter microstructure (additionally adjusted by hypertension, dyslipidemia and physical activity)

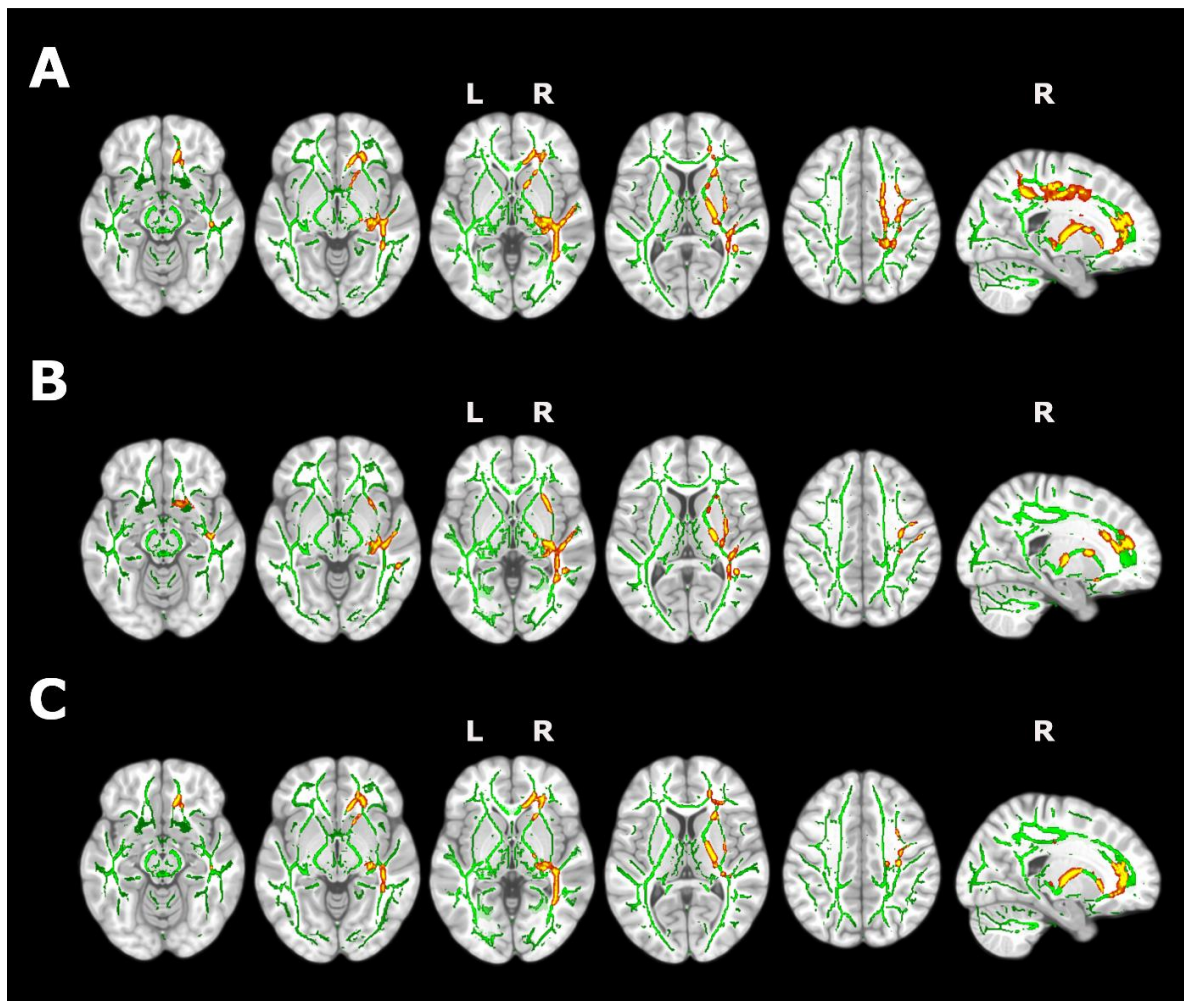

Significant white matter clusters derived from tract-based spatial statistics are represented in red-yellow over the skeletonized white matter tracts (green). Individuals with insomnia showed significantly reduced values of mean (A) and axial (B) diffusivity (FWE corrected  $p$  value  $< 0.05$ ), and a trend for radial diffusivity (C) (FWE corrected  $p$  value between 0.05 and 0.1), compared with normal sleepers. L: Left hemisphere. R: right hemisphere.

**Table S1. VBM results of the main effect of insomnia, additionally adjusted by hypertension, dyslipidemia and physical activity ( $p_{\text{uncorrected}} < 0.005$ ;  $k=100$ )**

| Contrast | Anatomical area           | Cluster size (k) | Peak-level t-value | $P_{\text{uncorrected}}$ | MNI coordinates |     |    |
|----------|---------------------------|------------------|--------------------|--------------------------|-----------------|-----|----|
|          |                           |                  |                    |                          | x               | y   | z  |
| I<C      | Bilateral PCC / precuneus | 516              | 3.77               | <.001                    | 6               | -56 | 8  |
|          | Bilateral middle cingulum | 161              | 3.66               | <.001                    | 2               | 9   | 42 |
|          | Right middle temporal     | 147              | 3.59               | <.001                    | 48              | -72 | 11 |
|          | Right thalamus            | 112              | 2.92               | .002                     | 11              | -30 | 11 |
| I>C      | Left caudate              | 211              | 3.03               | .001                     | -6              | 9   | 3  |

I: Insomnia. C: Controls. PCC: posterior cingulate cortex.

**Table S2. VBM results of interaction between insomnia and *APOE* genotype**  
( $p_{\text{uncorrected}} < 0.005$ ;  $k=100$ )

| Genetic model                                         | Anatomical area                                            | Cluster size (k)            | Peak-level t-value | MNI coordinates |       |       |       |       |
|-------------------------------------------------------|------------------------------------------------------------|-----------------------------|--------------------|-----------------|-------|-------|-------|-------|
|                                                       |                                                            |                             |                    | Puncorrected    | x     | y     | z     |       |
| Additive                                              | Left Angular gyrus                                         | 656                         | 4.670443058        | <.001           | -40.5 | -63   | 34.5  |       |
|                                                       | Left Superior Frontal Gyrus                                | 326                         | 4.081087112        | <.001           | -12   | 45    | 34.5  |       |
|                                                       | Right/Left Superior Frontal Gyrus / Middle Cingulate Gyrus | 733                         | 3.836615801        | <.001           | 3     | 21    | 60    |       |
|                                                       | Left Middle Temporal Gyrus                                 | 179                         | 3.824887753        | <.001           | -61.5 | -25.5 | -13.5 |       |
|                                                       | Right Hippocampus/Thalamus                                 | 207                         | 3.724496841        | <.001           | 13.5  | -34.5 | 7.5   |       |
|                                                       | Left Middle Temporal Gyrus                                 | 113                         | 3.549753666        | <.001           | -54   | -51   | 3     |       |
|                                                       | Left Pre/postcentral Gyrus                                 | 259                         | 3.452485323        | <.001           | -51   | -16.5 | 43.5  |       |
|                                                       | Right Postcentral gyrus                                    | 167                         | 3.309949875        | <.001           | 51    | -13.5 | 19.5  |       |
|                                                       | Right Fusiform                                             | 166                         | 3.285665512        | <.001           | 27    | -66   | -7.5  |       |
|                                                       | Right Precentral gyrus                                     | 476                         | 3.280437231        | <.001           | 55.5  | -12   | 28.5  |       |
|                                                       | Right Hippocampus                                          | 224                         | 3.228650331        | <.001           | 31.5  | -34.5 | 1.5   |       |
|                                                       | Left Thalamus                                              | 103                         | 2.902390003        | .002            | -10.5 | -36   | 4.5   |       |
|                                                       | Dominant                                                   | Left Middle Temporal Gyrus  | 321                | 4.27658606      | <.001 | -63   | -24   | -13.5 |
| Left Postcentral Gyrus                                |                                                            | 589                         | 4.0510211          | <.001           | -51   | -16.5 | 45    |       |
| Left Inferior Parietal Lobule                         |                                                            | 634                         | 4.01766729         | <.001           | -42   | -64.5 | 37.5  |       |
| Left Middle Occipital Gyrus                           |                                                            | 311                         | 3.76290226         | <.001           | -49.5 | -79.5 | -4.5  |       |
| Right Postcentral Gyrus                               |                                                            | 489                         | 3.67131305         | <.001           | 58.5  | -22.5 | 30    |       |
| Right Postcentral Gyrus                               |                                                            | 173                         | 3.63615155         | <.001           | 51    | -13.5 | 19.5  |       |
| Left Superior/Middle Frontal Gyrus / Middle Cingulate |                                                            | 665                         | 3.6264267          | <.001           | -6    | 13.5  | 57    |       |
| Left Middle Temporal Gyrus                            |                                                            | 123                         | 3.61123657         | <.001           | -52.5 | -49.5 | 3     |       |
| Left Superior Temporal Gyrus                          |                                                            | 134                         | 3.60978031         | <.001           | -42   | -51   | 19.5  |       |
| Right Thalamus / Right hippocampus                    |                                                            | 162                         | 3.58622289         | <.001           | 12    | -34.5 | 6     |       |
| Left Frontal Superior Medial Gyrus                    |                                                            | 100                         | 3.35894251         | <.001           | 0     | 49.5  | 36    |       |
| Recessive                                             |                                                            | Left Angular Gyrus          | 354                | 4.62541676      | <.001 | -40.5 | -63   | 34.5  |
|                                                       |                                                            | Left Frontal Superior Gyrus | 208                | 4.21207428      | <.001 | -12   | 45    | 36    |
|                                                       | Right/Left Superior Frontal Gyrus                          | 275                         | 3.92293334         | <.001           | 3     | 21    | 60    |       |
|                                                       | Right Hippocampus                                          | 307                         | 3.43951154         | <.001           | 33    | -27   | -9    |       |
|                                                       | Right Fusiform Gyrus                                       | 231                         | 3.37325096         | <.001           | 25.5  | -67.5 | -6    |       |
|                                                       | Right Frontal Superior Medial Gyrus                        | 126                         | 3.08985639         | .001            | 12    | 27    | 43.5  |       |
|                                                       | Right Supramarginal Gyrus / Right Postcentral Gyrus        | 158                         | 3.04352212         | .001            | 63    | -19.5 | 39    |       |
